# Supplementary material for: Extending the viability of acute brain slices
Source: PubMed Central journal article supplement — Sci Rep. 2014 Jun 16;4:5309. doi: 10.1038/srep05309 (PMC4058870; doi:10.1038/srep05309), 2014-06-16

## **Extending the viability of acute brain slices**

Yossi Buskila<sup>1\*</sup>, Paul P. Breen<sup>1</sup>, Jonathan Tapson<sup>1</sup>, André van Schaik<sup>1</sup>, Matthew Barton<sup>2</sup> and John W. Morley<sup>1,2</sup>

### Supplementary Figure 1

Mass spectrometry analysis depicts the negative (a) and positive (b) charged molecules in the aCSF at time 0 and 24 hours after incubation in the Braincubator, showing similar molecular signature over time.

### Supplementary Video 1

Brain slice viability after 30 hrs in control recovery chamber. IR-DIC imaging of a slice following 30 hours in control bath chamber (x60) along the Z-axis, from the slice surface to -100  $\mu\text{m}$ , depicting the morphology of dead cells (large vacuole) and absence of viable neurons. Note the bacterial movements on the surface of the slice.

### Supplementary Video 2

Brain slice viability after 30 hrs in the Braincubator. IR-DIC imaging of a slice following 30 hours in the Braincubator (x60) along the Z-axis, from the slice surface to -100  $\mu\text{m}$ , depicting the morphology of viable neurons (smooth membrane).

# Supplementary Figure 1 - Mass spectrometry analysis

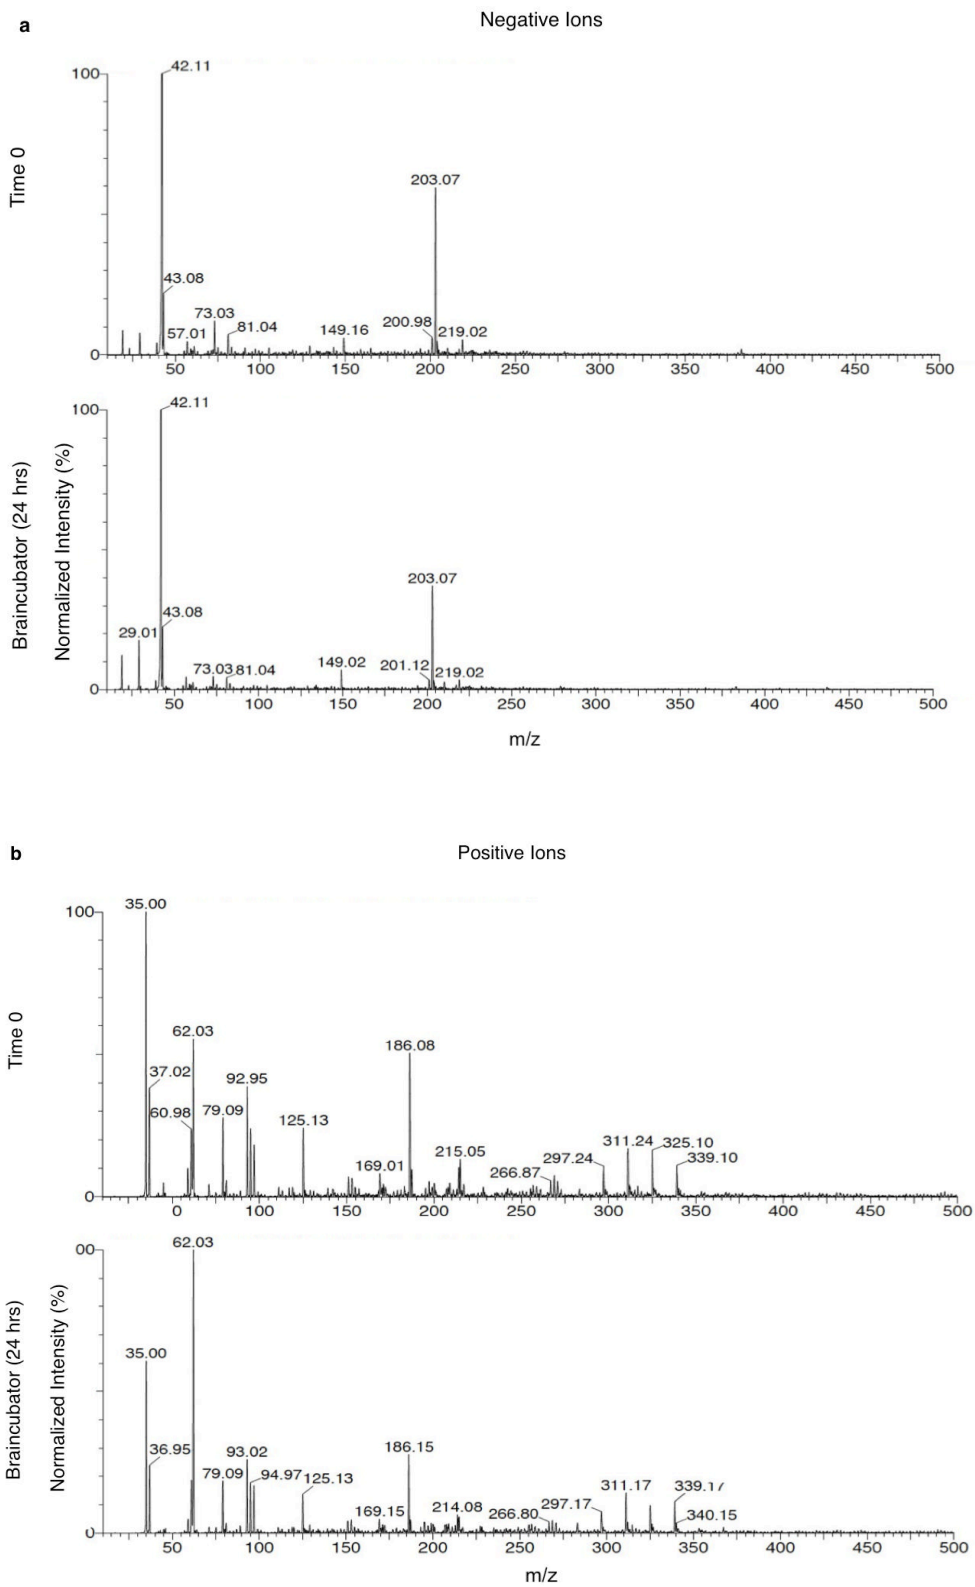

Supplement: srep05309-s1.pdf [file srep05309-s1.pdf]
